# Supplementary material for: GATA3 frameshift mutation promotes tumor growth in human luminal breast cancer cells and induces transcriptional changes seen in primary GATA3 mutant breast cancers
Source: PubMed Central journal article supplement (PMC5732738; doi:10.18632/oncotarget.21910), 2017-10-20
Supplement: oncotarget-08-103415-s001.pdf [file oncotarget-08-103415-s001.pdf]

## ***GATA3* frameshift mutation promotes tumor growth in human luminal breast cancer cells and induces transcriptional changes seen in primary *GATA3* mutant breast cancers**

### **SUPPLEMENTARY MATERIALS**

**Supplementary Table 1: Genes with significantly different expression between parental MCF-7 and *GATA3* WT clones with adjusted *P* value < 0.05. See Supplementary\_Table\_1**
